# Supplementary material
Source: PubMed Central journal article supplement (PMC9895195)
Supplement: 12070_2021_2691_MOESM1_ESM.pdf [file 12070_2021_2691_MOESM1_ESM.pdf]

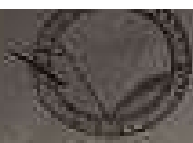

INSTITUTIONAL ETHICS COMMITTEE  
INSTITUTE OF MEDICAL SCIENCES (IMS) AND SUM HOSPITAL,

Nilisha 'O' Amaraiah (Deemed to be University)

(Accredited by NMAC of DGE with 'A' grade)

IEC Registration Number: - ICR/617/Ins/OH/2014/RE-20

Letter Number: DR/IMS,SH/SGA/18/26/2020

Date: 27<sup>th</sup> Oct 2020

To

Dr. Suvranita Jena  
Dept. of Oral Medicine and Radiology  
Institute of Dental Science  
S.O.A University Bhubaneswar

**Ref Study:** Exploring the prevalence, patterns and variations of anterior loop of inferior alveolar nerve- A CBCT based retrospective study.

**Guide Name:** Dr. Rajar Panigrahi

**Sub:** Approval letter for the document submitted for the above mentioned study

Dear Dr. Suvranita Jena

The Institutional Ethics Committee, IMS & SUM Hospitals, Bhubaneswar reviewed and discussed the following documents submitted by you on date 7<sup>th</sup> Feb, 2020, related to the conduct of above mentioned study at the meeting held on 21<sup>st</sup> Oct, 2020.

The following documents were reviewed:

**DOCUMENTS REVIEWED**

1. Protocol Synopsis dated : 07.02.20
2. ICF English : 07.02.20
3. ICF Odia : 07.02.20

The following members of the IEC Committee, IMS & Hospitals, Bhubaneswar were present at the meeting held on 21<sup>st</sup> Oct, 2020, Dept. of Pharmacology, 3<sup>rd</sup> Floor, College Building, IMS & SUM Hospital, Bhubaneswar.

| SL NO | NAME                 | GENDER | HIGHEST QUALIFICATION         | AFFILIATION WITH THE ORGANIZATION | DESIGNATION               |
|-------|----------------------|--------|-------------------------------|-----------------------------------|---------------------------|
| 1     | Dr P.K Das           | Male   | MBBS (MD-<br>Medicine)        | No                                | Chairperson               |
| 2     | Prof Dr SS Mishra    | Male   | MBBS (MD-<br>Pharmacology)    | Yes                               | Member Secretary          |
| 3     | Dr Swati Mishra      | Femal  | MBBS (MD-<br>Pharmacology)    | Yes                               | Basic Medical<br>Sciences |
| 4     | Dr Bikash Ranjan Kar | Male   | MBBS (MD - MD-<br>Skin & VD ) | Yes                               | Clinician                 |
| 5     | Dr B Dwivedi         | Male   | MBBS (MD -<br>Paediatrics )   | No                                | Clinician                 |

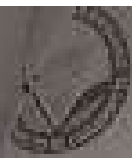

**INSTITUTIONAL ETHICS COMMITTEE  
INSTITUTE OF MEDICAL SCIENCES (IMS) AND SUM HOSPITAL**

Siksha 'O' Anusandhan (Deemed to be University)

(Accredited by NAAC of UGC with 'A' grade)

IEC Registration Number: - ECR/627/Ins/01/2014/RII-20

|     |                        |        |              |     |                         |
|-----|------------------------|--------|--------------|-----|-------------------------|
| 6.  | Mr Santanu Das         | Male   | BA (Hon) LLB |     | Legal expert            |
| 7.  | Mrs Kasturika Pattnaik | Female | BA           | No  | Social Scientist        |
| 8.  | Dr Manoranjan Mallick  | Male   | BA (Ph.D)    | No  | Social Scientist        |
| 9.  | Mrs Sasmita Mishra     | Female | BA (M.A.)    | No  | Lay Person              |
| 10. | Dr Jayashankar Das     | Male   | M.Sc (Ph.D)  | Yes | Acting Member Secretary |

After due ethical consideration, the Committee has approved the aforementioned documents submitted by you.

The Institutional Ethics Committee should be informed about the progress of the study annually and final report/ outcome of the study at the end.

Yours Truly,

**Dr. S.S Mishra**

Member Secretary,

Institutional Ethics Committee IMS & SUM Hospital

Bhubaneswar

Member Secretary

Institutional Ethics Committee

IMS & SUM Hospital, Deemed to be University

K-8, Kalinga Nagar, Bhubaneswar

Copy to: Director Research and Innovation

\* The Institutional Ethics Committee is constituted and works as per the ICM-GUP, ICMR and Schedule Y guidelines.
